# Supplementary material for: A novel five-zinc finger-related-gene signature related to tumor immune microenvironment allows for treatment stratification and predicts prognosis in clear cell renal cell carcinoma patients
Source: Research Square preprint supplement (doi:10.21203/rs.3.rs-207677/v1), 2021-02-23
Supplement: Supplementary file 1 [file 03e8df0aa6d08756f53aa3dd.xlsx]

## Sheet: Sheet1
gene	conMean	treatMean	logFC	pValue	fdr
ZBTB32	0.0748977	0.271963	1.86041	5.69833e-23	3.7004e-22
ZIC3	0.0150609	0.00317708	-2.24503	8.34536e-21	4.37508e-20
TRMT1	4.00539	9.0013	1.16819	7.66295e-38	6.36428e-36
USP44	0.69356	0.0888144	-2.96515	8.59578e-40	1.93773e-37
CASZ1	1.8098	0.449122	-2.01065	4.64346e-37	2.81823e-35
DDX41	12.3129	25.1341	1.02948	1.71827e-33	4.17144e-32
AGAP4	0.232679	0.511758	1.13712	6.62231e-14	2.02128e-13
TRIM2	26.693	7.62995	-1.80671	2.29478e-35	9.05292e-34
TRIM46	0.131882	0.508832	1.94794	1.05294e-18	4.62823e-18
ZNF90	0.410863	0.855399	1.05794	5.71812e-08	1.13357e-07
ZNF121	1.77219	3.54477	1.00016	1.91606e-23	1.29211e-22
TRIM40	0.0388754	0.0116745	-1.73549	7.35419e-12	1.93738e-11
ZFHX2	0.905389	0.27375	-1.72568	1.20173e-37	9.48162e-36
TRIM36	0.162371	0.394505	1.28075	2.23964e-21	1.2622e-20
TRIM59	0.395179	0.890232	1.17168	7.4266e-30	9.68526e-29
TRIM52	1.50878	3.31879	1.13727	1.91606e-23	1.29211e-22
ZMAT1	1.83355	4.17636	1.18761	1.41946e-11	3.63032e-11
ZNF534	0.0199379	0.0440617	1.14401	5.18645e-05	8.09719e-05
ZNF581	5.68764	11.7929	1.05202	6.49561e-31	9.66988e-30
RNF182	1.33491	0.560443	-1.25211	2.80965e-22	1.73868e-21
RPH3A	0.0150188	0.0459522	1.61337	6.30663e-11	1.53815e-10
SYTL5	0.896127	0.287677	-1.63925	6.07535e-31	9.13038e-30
XAF1	0.609519	2.51246	2.04336	3.11597e-25	2.58789e-24
ZNF385D	0.881024	0.35564	-1.30876	1.24565e-23	8.58358e-23
ZIM2	0.0487849	0.018478	-1.40063	6.29881e-22	3.70877e-21
ZNF205	3.70164	7.60015	1.03786	1.19758e-31	1.98924e-30
ZNF331	7.26712	3.19	-1.18783	6.58436e-20	3.17741e-19
ZNF503	9.43419	2.47524	-1.93033	3.25547e-37	2.23354e-35
ZIC5	0.00629784	0.0454561	2.85154	6.99005e-05	0.000107613
ZNF729	0.0206946	0.00948978	-1.12481	4.16886e-24	3.03155e-23
ZNF750	0.309843	0.140057	-1.14552	1.74157e-24	1.30866e-23
ZNF831	0.0729281	0.362104	2.31186	8.22711e-25	6.42692e-24
ZNF488	0.819365	0.0758048	-3.43415	4.57757e-34	1.24542e-32
SNAI3	0.42489	1.0601	1.31904	5.2816e-27	5.17663e-26
ZNF826P	3.21391	9.87924	1.62007	1.32445e-16	5.01195e-16
ZNF469	0.105593	0.450659	2.09352	6.99734e-32	1.21338e-30
ZNF474	0.0678402	0.138435	1.029	1.16047e-11	3.00201e-11
ZNF395	9.71192	61.9209	2.6726	9.33699e-36	3.9821e-34
ZNF806	0.0310481	0.0059804	-2.37619	7.65987e-27	7.4155e-26
NR5A1	0.00869008	0.0439182	2.33738	0.00563062	0.00751703
TRIM14	4.6716	10.5802	1.17938	6.27995e-21	3.34789e-20
TRIM74	0.0209958	0.0965187	2.20071	9.14319e-14	2.73775e-13
U2AF1L5	0.0217474	0.0580296	1.41595	6.27636e-05	9.6909e-05
ZNF804B	0.31412	0.0491091	-2.67725	2.41207e-21	1.35453e-20
ZNF683	0.115488	1.20981	3.38897	3.29177e-33	7.01949e-32
TRIM75P	0.00664023	0.0466901	2.81381	5.44551e-08	1.08088e-07
TRIM31	0.0468907	0.0995058	1.08548	1.37251e-07	2.63161e-07
ZNF878	0.320207	0.13975	-1.19616	2.39338e-19	1.11409e-18
ZNF705E	0.0198133	0.0460238	1.21591	1.49415e-11	3.809e-11
ZIC2	0.0248336	0.117083	2.23717	0.000310948	0.000456868
ZNF83	3.58614	10.226	1.51173	2.45992e-29	3.0565e-28
PRDM16	4.66568	0.346762	-3.75007	2.58239e-40	8.46565e-38
RNF223	0.379923	0.0518252	-2.87398	1.89151e-33	4.35825e-32
RFPL4A	0.031624	0.0764026	1.2726	2.86593e-05	4.56351e-05
TCF19	3.33377	8.41638	1.33604	5.12833e-21	2.76195e-20
SALL3	0.652007	0.140565	-2.21365	4.86032e-34	1.29993e-32
TRIM29	0.742175	0.333631	-1.15351	3.3177e-16	1.2063e-15
PDZRN3	3.8383	1.74225	-1.13952	3.00342e-26	2.70823e-25
RNF212B	2.27819	0.136963	-4.05603	7.85387e-31	1.12667e-29
RNF225	0.0296155	0.00965791	-1.61657	2.30846e-06	4.02959e-06
TRIM73	0.0117934	0.0491139	2.05815	2.17281e-15	7.42143e-15
TDRD1	0.508937	0.125978	-2.01431	2.35357e-36	1.19804e-34
RNF207	0.845602	1.91329	1.178	3.1938e-08	6.43654e-08
SP7	0.0037708	0.0161196	2.09587	3.63523e-06	6.242e-06
SYTL4	3.77053	1.68655	-1.16069	1.3194e-23	9.05225e-23
WT1	5.66149	0.999447	-2.50198	1.20938e-19	5.73093e-19
RUFY4	0.00887558	0.282117	4.99031	8.91598e-35	2.93113e-33
TRIM9	0.27362	2.00229	2.87141	1.04976e-33	2.67182e-32
TRIM7	0.233699	0.645107	1.46489	2.1967e-05	3.53713e-05
VAV3	27.1735	10.4454	-1.37933	3.6066e-35	1.35505e-33
SIAH3	1.24428	0.0372201	-5.06309	1.24144e-39	2.39107e-37
UNC13A	0.0664337	0.155329	1.22534	0.00595073	0.00791091
ZNF728	0.516049	0.097711	-2.40092	3.91345e-35	1.43614e-33
SH3RF3	1.37978	3.12676	1.18023	1.23489e-21	7.06032e-21
U2AF1	0.0347154	0.108765	1.64757	8.55972e-11	2.07166e-10
TET3	1.0031	2.08158	1.05321	1.40194e-27	1.42726e-26
ZNF189	8.23992	16.8415	1.03132	3.30666e-11	8.21718e-11
ZNF248	1.89712	3.8037	1.00359	4.70532e-23	3.08091e-22
ZNF44	6.80055	2.74651	-1.30805	1.76334e-33	4.21598e-32
ZNF556	0.211332	0.0955955	-1.1445	7.37069e-18	3.04475e-17
TRAF2	2.88729	5.93137	1.03865	3.19445e-33	6.90527e-32
VAV1	0.707467	3.58658	2.34187	5.87004e-34	1.54382e-32
VDR	10.8537	3.35995	-1.69168	2.79868e-23	1.87132e-22
ZNF26	0.403563	0.814043	1.01231	1.00282e-22	6.40161e-22
ZGLP1	0.148044	0.356489	1.26783	4.47704e-14	1.38797e-13
AMFR	61.3592	22.5068	-1.44692	4.49177e-38	4.43001e-36
EBF3	0.357166	1.15083	1.688	5.0209e-15	1.67151e-14
DGKD	1.21406	5.38336	2.14867	4.23963e-37	2.67605e-35
DGKZ	3.08551	7.62294	1.30484	1.19658e-34	3.85346e-33
AGAP2	0.173813	1.13906	2.71224	3.03053e-39	4.78218e-37
DCST1	0.0178158	0.10361	2.53993	3.16404e-20	1.56516e-19
CHFR	0.655054	1.4405	1.13688	5.4645e-35	1.95977e-33
BCL6B	4.77314	12.165	1.34973	1.69345e-18	7.32129e-18
EGR4	0.138697	0.0437209	-1.66554	2.50576e-09	5.50709e-09
ESRRG	9.95792	1.15286	-3.11062	5.611e-41	4.42708e-38
AGAP6	0.564174	1.74587	1.62973	8.87241e-17	3.4148e-16
EBF2	0.318785	2.13415	2.74301	1.94547e-31	3.1649e-30
ADAP2	1.96094	7.32284	1.90086	2.89155e-37	2.07403e-35
U2AF1L4	1.30475	2.90027	1.15241	2.47036e-16	9.0446e-16
RNF151	0.00639274	0.0222514	1.79939	5.15418e-06	8.75489e-06
FGD2	0.269128	1.60334	2.57472	1.80717e-34	5.48407e-33
CXXC4	0.403872	0.840195	1.05682	2.70378e-08	5.46996e-08
CHN2	2.03935	0.694823	-1.55339	1.23653e-36	6.72843e-35
AGAP9	0.659345	1.57594	1.25711	8.44395e-09	1.77661e-08
AGAP5	0.0321568	0.111756	1.79716	4.63703e-18	1.94607e-17
CHD3	20.5457	10.2443	-1.00401	3.07268e-26	2.75493e-25
AGFG2	10.2762	4.42968	-1.21403	7.10198e-10	1.62184e-09
ANKZF1	2.86803	8.05312	1.48949	2.64482e-29	3.23529e-28
BTK	0.541992	2.52774	2.2215	3.60272e-33	7.58012e-32
BSPRY	11.7663	2.66129	-2.14446	2.73474e-36	1.34857e-34
ZNF157	0.231006	0.0990293	-1.222	1.52633e-21	8.69513e-21
TRIM55	3.60966	7.42476	1.04048	7.28934e-12	1.92351e-11
UHRF1	0.175343	0.999957	2.51169	2.34985e-34	6.8668e-33
ZMYND12	4.20812	1.68195	-1.32304	7.66444e-31	1.10959e-29
ZFP42	0.0425778	0.016578	-1.36083	5.75805e-30	7.57184e-29
TRIML1	0.00288273	0.01619	2.48959	1.02097e-07	1.97679e-07
ZNF98	0.462721	0.10417	-2.15121	3.68687e-34	1.02068e-32
STAC3	0.440973	2.16155	2.2933	6.64605e-39	8.73956e-37
ZGRF1	0.161285	0.401704	1.31652	1.02632e-24	7.93891e-24
RTL4	0.378157	0.106653	-1.82606	1.1837e-23	8.19247e-23
ZNF320	3.64096	8.05875	1.14624	2.40949e-19	1.11828e-18
ZNF337	0.439783	1.10558	1.32994	4.56189e-24	3.27212e-23
ZBTB8B	0.0201046	0.00833609	-1.27008	4.6814e-31	7.10313e-30
ZNRF3	0.128581	0.0541223	-1.24839	9.04553e-27	8.65081e-26
ZSCAN5DP	0.0168062	0.0589983	1.81168	8.76011e-08	1.7003e-07
ZNF177	0.00494079	0.0133081	1.42949	2.38557e-05	3.82953e-05
TNFAIP3	6.157	15.3819	1.32094	3.50988e-25	2.89979e-24
TRIM22	6.87298	18.1059	1.39745	3.64514e-27	3.68719e-26
ZNF804A	0.350568	0.15561	-1.17176	1.94675e-05	3.15397e-05
ZC3H12D	0.17203	0.535988	1.63954	4.32473e-22	2.62289e-21
ZNF80	0.0132794	0.0846075	2.6716	4.02237e-20	1.98353e-19
ZNF705A	0.00270622	0.0128902	2.25193	1.46612e-09	3.28161e-09
ZNF354B	1.30351	2.91042	1.15883	3.4907e-23	2.31442e-22
RTL3	0.0115953	0.0346994	1.58137	0.00103051	0.00145973
SP140	0.248055	0.866995	1.80536	4.89124e-21	2.64328e-20
ZNF726	0.485492	0.179743	-1.43351	3.85203e-31	6.01832e-30
ZNF732	0.0435512	0.107083	1.29794	5.53212e-13	1.59011e-12
ZNF841	1.41633	3.0941	1.12736	1.88564e-20	9.44618e-20
ZHX3	14.3193	5.8867	-1.28242	1.67012e-34	5.16756e-33
TRIM15	1.91522	4.75275	1.31126	3.98016e-12	1.06453e-11
ZNF276	1.01227	2.54689	1.33115	3.0353e-24	2.22777e-23
ZMYND15	0.558497	1.87243	1.74529	2.42575e-33	5.46832e-32
ZNF692	1.50879	5.38235	1.83484	1.81677e-26	1.69637e-25
SAP30	2.61693	14.652	2.48515	1.83153e-38	1.92677e-36
ZIC4	0.00413298	0.0171314	2.05139	2.63679e-06	4.5772e-06
ZNF296	0.322365	0.926108	1.52249	1.43933e-24	1.10255e-23
ZNF425	1.57757	0.679427	-1.21532	1.37008e-35	5.54356e-34
ZSCAN4	0.0267048	0.0888854	1.73485	3.67933e-11	9.07184e-11
ZNF676	0.781154	0.340395	-1.1984	8.99223e-25	6.99002e-24
BCL11A	0.160437	0.475625	1.56782	1.73003e-15	5.94769e-15
CREB5	1.37099	3.91888	1.51522	6.59196e-25	5.20106e-24
CAPN15	2.82624	7.04216	1.31713	1.92144e-34	5.72081e-33
MECOM	26.0686	4.41495	-2.56185	2.6824e-40	8.46565e-38
PRDM1	1.25364	6.25337	2.31851	1.99534e-36	1.04955e-34
RASA3	3.36375	9.00596	1.42081	2.31814e-31	3.73267e-30
RNF222	0.00607926	0.0169849	1.48228	0.000766099	0.00109304
RAG2	0.125958	0.00912679	-3.78669	1.00608e-22	6.40161e-22
RNF166	2.03751	5.05957	1.3122	9.33699e-36	3.9821e-34
L3MBTL1	0.329488	0.685752	1.05746	6.57108e-08	1.2865e-07
NR5A2	0.501486	1.21961	1.28214	8.90251e-20	4.24416e-19
NEURL3	2.95625	1.45567	-1.02209	1.30217e-09	2.92293e-09
PHF21B	0.236903	0.0518963	-2.19059	3.51619e-34	9.90813e-33
RASSF5	1.45785	4.86058	1.73729	9.68152e-29	1.14011e-27
PPARA	8.6377	4.29683	-1.00738	5.64333e-25	4.49756e-24
RNF113B	0.0151288	0.102543	2.76086	8.15965e-05	0.000124646
OVOL1	3.54653	0.689474	-2.36284	1.18184e-36	6.66052e-35
PDZRN4	0.600892	0.223038	-1.42982	2.03593e-26	1.86785e-25
RORB	0.260296	0.122782	-1.08405	1.71462e-28	1.94653e-27
AGAP11	0.0397215	0.187049	2.23543	4.46207e-16	1.61125e-15
PRDM14	0.105962	0.0277165	-1.93473	0.000100695	0.000152785
IKZF3	0.3314	2.03011	2.61491	1.79988e-28	2.02872e-27
ARAP3	3.67732	7.35725	1.00051	1.07213e-15	3.75128e-15
INO80B	1.11841	2.38	1.08951	1.72899e-24	1.30543e-23
PRDM12	0.00995764	0.023479	1.2375	0.000170935	0.000254949
AGAP7P	0.0557151	0.146079	1.39061	1.53767e-06	2.72328e-06
BIRC3	5.13888	25.9059	2.33376	1.64337e-29	2.09132e-28
NR1I2	0.0376915	0.103593	1.45861	3.98973e-10	9.20438e-10
PCGF1	2.87508	5.91528	1.04084	8.31232e-39	1.00899e-36
KSR2	0.899368	0.0989937	-3.1835	1.36373e-39	2.39107e-37
CBFA2T3	0.342485	0.719064	1.07008	1.55101e-15	5.36732e-15
NR1H3	4.20429	8.72317	1.05299	5.40672e-30	7.16959e-29
PRKD1	8.5664	4.18486	-1.03351	3.9822e-31	6.10089e-30
LONRF2	1.43775	0.395288	-1.86283	3.9822e-31	6.10089e-30
DNMT3L	0.177691	0.0252088	-2.81737	8.98159e-18	3.68128e-17
DGKI	0.384588	1.22031	1.66586	0.00737536	0.0097229
NEIL3	0.0636038	0.418741	2.71887	6.93373e-35	2.37857e-33
IRF2BPL	23.2948	8.39094	-1.4731	1.80958e-33	4.26196e-32
RASAL1	9.719	4.64034	-1.06658	2.71915e-09	5.95947e-09
RFPL2	0.0271034	0.0869214	1.68124	2.70721e-10	6.31017e-10
RARA	7.26234	15.1948	1.06508	8.7108e-27	8.38149e-26
NR2E1	0.035361	0.71988	4.34753	1.25608e-05	2.06253e-05
RNF165	0.253882	0.681703	1.42498	3.91554e-13	1.13163e-12
RNF175	0.0837702	0.437738	2.38556	6.21963e-32	1.09051e-30
RNF150	8.59508	0.989697	-3.11845	2.26065e-40	8.46565e-38
POLR3B	4.61837	1.98117	-1.22103	5.93501e-37	3.46868e-35
PML	4.12749	9.57467	1.21396	3.33296e-36	1.59376e-34
RPL37	37.7594	75.9826	1.00883	1.35791e-31	2.23206e-30
PYGO1	1.04722	0.333788	-1.64957	3.08273e-28	3.40178e-27
PLAGL1	1.83617	4.41818	1.26675	2.69205e-21	1.48534e-20
PNMA3	0.854319	2.3891	1.48362	0.00774349	0.0101827
SALL4	0.0507602	0.185509	1.86972	3.86403e-06	6.61327e-06
SLX1A	0.00353848	0.0152408	2.10673	6.03044e-08	1.19249e-07
BIRC7	0.0715089	9.15153	6.99975	4.93566e-32	8.75109e-31
BCL11B	0.334574	1.04857	1.64803	6.76342e-21	3.59349e-20
MEFV	0.116192	0.458299	1.97977	1.85502e-29	2.32319e-28
PEG3	2.88684	0.568262	-2.34486	5.67207e-40	1.49175e-37
PLAG1	0.776258	0.24502	-1.66363	1.43328e-33	3.59003e-32
DPF1	0.0290712	0.0698565	1.2648	1.66054e-10	3.93444e-10
LNX1	7.00073	2.43617	-1.52289	3.59448e-32	6.51964e-31
ARHGAP45	2.68112	7.69766	1.52159	1.41433e-32	2.78977e-31
NR1I3	1.19247	0.217708	-2.45348	2.6283e-32	4.82262e-31
RBCK1	14.2982	32.0822	1.16594	1.22022e-35	5.06714e-34
ACAP1	0.646467	2.36556	1.87153	1.07699e-32	2.15126e-31
RASGRP3	2.12565	4.54984	1.09792	1.02974e-25	8.83117e-25
GMIP	1.87437	5.70102	1.60481	7.65557e-33	1.56889e-31
OVOL2	1.24552	0.112867	-3.46405	1.2739e-38	1.43586e-36
NR4A3	7.69766	3.26495	-1.23736	7.82698e-09	1.6512e-08
GFI1B	0.0199007	0.0408688	1.03818	2.45025e-07	4.60297e-07
GTSF1	0.0898104	0.238277	1.40769	8.10905e-19	3.59441e-18
MDM4	1.99978	4.01883	1.00694	5.41724e-14	1.66961e-13
NR4A2	12.3492	5.54127	-1.15613	3.53377e-08	7.10356e-08
MEX3B	0.326774	0.741375	1.18191	2.04412e-16	7.53649e-16
MYT1L	0.00251606	0.00874464	1.79723	0.0203267	0.0254568
MYO9B	4.17835	9.48298	1.18241	4.86438e-33	1.01e-31
ASAP1	4.15257	8.76019	1.07696	1.13542e-25	9.68486e-25
PRKCA	8.38253	3.6597	-1.19566	9.87503e-32	1.65775e-30
KLF5	10.3322	3.65971	-1.49735	1.0667e-27	1.11474e-26
MSS51	0.217667	0.62222	1.5153	2.92854e-15	9.89557e-15
KLF1	0.0280786	0.0742387	1.4027	3.97702e-13	1.1473e-12
NANOS1	1.42518	0.462029	-1.62509	2.46394e-21	1.37876e-20
IKZF1	0.657617	2.85247	2.11689	1.06527e-28	1.24518e-27
OVOL3	0.0195301	0.08738	2.1616	8.85298e-09	1.85771e-08
RFPL3	0.0168601	0.0457959	1.4416	3.58078e-11	8.86194e-11
NEURL1B	4.73386	10.5252	1.15276	1.56977e-18	6.82396e-18
RNF152	20.8021	9.55678	-1.12213	1.08757e-16	4.15543e-16
RNF43	3.68261	0.636477	-2.53255	5.50169e-38	5.10686e-36
THRB	6.16223	1.62961	-1.91893	6.43404e-38	5.64051e-36
RNF149	8.16123	20.5289	1.3308	3.45493e-36	1.60349e-34
FAM170A	0.00667784	0.0256335	1.94058	5.94208e-07	1.084e-06
GATA5	0.860233	0.201384	-2.09478	4.35081e-22	2.62289e-21
PRKCG	0.0059675	0.0446436	2.90326	1.03479e-07	2.00111e-07
NR3C2	11.148	2.76216	-2.01292	1.39155e-37	1.04565e-35
RASGRP2	0.901608	1.94085	1.10612	9.5913e-17	3.6825e-16
ITK	0.260597	1.16576	2.16138	3.29009e-26	2.91672e-25
ASAP3	7.34822	3.34703	-1.13451	2.85664e-33	6.26081e-32
RASGRP4	0.268728	0.926071	1.78498	7.29343e-31	1.07561e-29
KSR1	2.70814	10.446	1.94758	2.59083e-28	2.89953e-27
PRKCQ	8.45384	2.65155	-1.67277	4.3891e-26	3.84778e-25
KLF8	1.07309	2.58076	1.26602	5.48686e-21	2.94499e-20
GATA2	9.24807	3.14101	-1.55792	2.78971e-30	3.76254e-29
GTSF1L	0.00880144	0.124905	3.82695	9.00517e-16	3.17191e-15
DTX1	5.94163	1.06012	-2.48663	7.73975e-36	3.48952e-34
ESCO2	0.0763364	0.214361	1.4896	1.67586e-28	1.91631e-27
EGR2	9.53576	4.33014	-1.13893	7.85073e-05	0.000120393
DGKA	0.815325	1.79545	1.1389	7.12413e-20	3.4274e-19
EGR3	6.34397	2.99325	-1.08367	4.57881e-05	7.20375e-05
FBXO43	0.0426288	0.145578	1.77189	2.60194e-21	1.44573e-20
GATA3	25.4481	2.86751	-3.14969	4.57461e-39	6.56248e-37
GLIS1	1.13862	4.35942	1.93685	1.83332e-24	1.36463e-23
FHL1	17.8323	57.6456	1.69272	4.43563e-20	2.17373e-19
GATA4	0.00770169	0.123379	4.00177	0.00100472	0.00142448
GFI1	0.164254	0.947007	2.52744	1.97692e-30	2.71267e-29
DGKH	1.06197	2.13335	1.00638	3.90607e-18	1.64368e-17
ESRRB	12.0169	0.186421	-6.01035	3.15488e-41	4.42708e-38
GIT2	2.02658	5.12555	1.33866	1.05293e-29	1.35084e-28
FOXP3	0.366837	1.16888	1.67191	5.19626e-13	1.49629e-12
DGKB	0.210118	0.0831153	-1.33802	6.45878e-11	1.57283e-10
CBLC	4.10083	0.988518	-2.05258	3.19035e-34	9.15339e-33
BMX	0.376926	1.10441	1.55092	3.28501e-19	1.5069e-18
DTX2	1.15855	2.84444	1.29582	4.08805e-37	2.67605e-35
BAZ1A	2.12026	4.87786	1.20201	4.44565e-30	5.94511e-29
